# Supplementary material for: Combining Culture-Dependent and Independent Approaches for the Optimization of Epoxiconazole and Fludioxonil-Degrading Bacterial Consortia
Source: MDPI journal article supplement (doi:10.3390/microorganisms9102109), 2021-10-07
Supplement: s1 [file s1]

**Figure S1.** Chemical structure of the target fungicides.

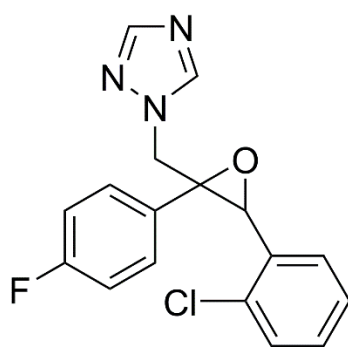

Epoxiconazole

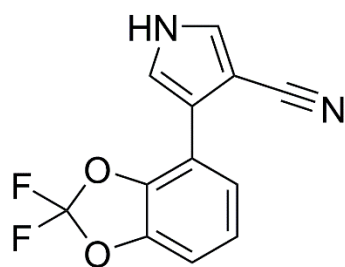

Fludioxonil

**Figure S2.** Growth of the bacterial isolates retrieved from the EPO and FLU-enriched consortia on 400 mgL<sup>-1</sup> of sodium acetate. Results are expressed as the mean of triplicates and error bars represent standard deviation. Lines connecting data points are just for guiding purposes.

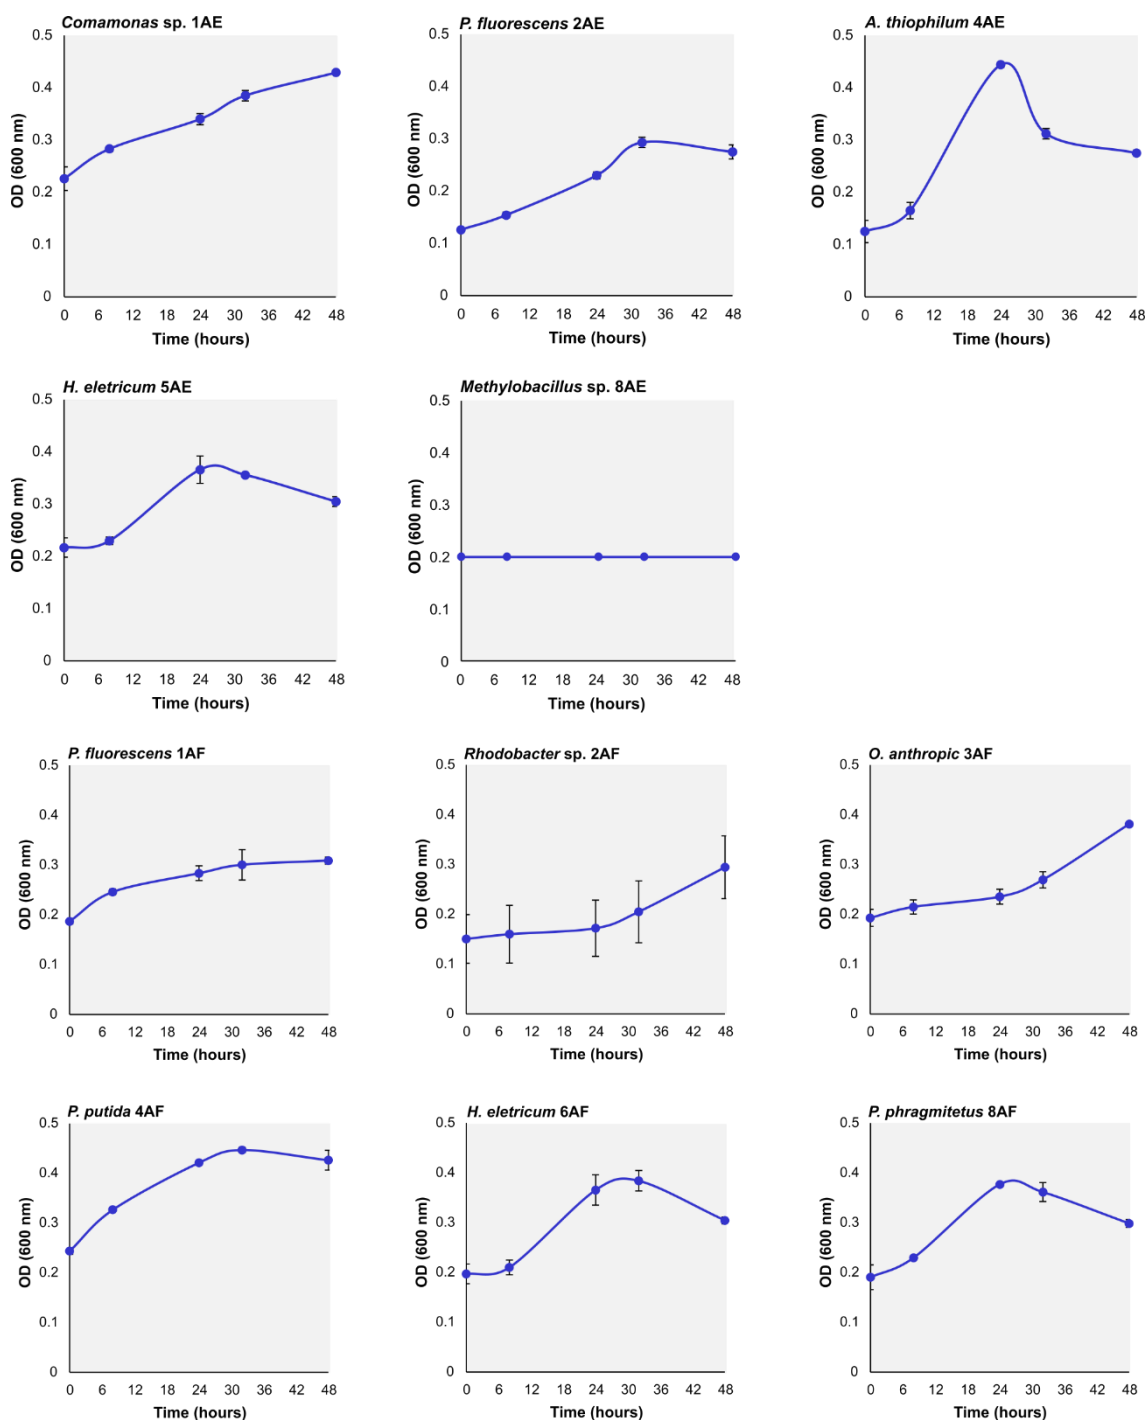

**Table S1.** Number of reads obtained for each OTU representing  $\geq 1\%$  of the relative abundance of the EPO-enriched consortium, either at the beginning (0 days) or at the end of the incubation period (21 days)

| OTU taxonomy               | Number of reads |         |
|----------------------------|-----------------|---------|
|                            | 0 days          | 21 days |
| <i>Azospirillum</i>        | 48358           | 34953   |
| <i>Methylobacillus</i>     | 122             | 3983    |
| <i>Proteiniphilum</i>      | 2297            | 2912    |
| <i>Reyranella</i>          | 1261            | 2003    |
| <i>Lentimicrobium</i>      | 1830            | 1555    |
| <i>Pannonibacter</i>       | 3961            | 1452    |
| <i>Arenimonas</i>          | 1128            | 1324    |
| <i>Hydrogenophaga</i>      | 656             | 1699    |
| <i>Prolixibactereaceae</i> | 54              | 1049    |
| <i>Taonella</i>            | 1451            | 1025    |
| <i>Paludibacter</i>        | 185             | 1014    |
| <i>Devosia</i>             | 480             | 930     |
| <i>Bryobacter</i>          | 701             | 915     |
| <i>Taibaiella</i>          | 844             | 884     |
| <i>Rikenellaceae</i>       | 558             | 614     |
| <i>Persicitalea</i>        | 1672            | 414     |

**Table S2.** Number of reads obtained for each OTU representing  $\geq 1\%$  of the relative abundance of the FLU-enriched consortium, either at the beginning (0 days) or at the end of the incubation period (21 days)

| OTU taxonomy             | Number of reads |         |
|--------------------------|-----------------|---------|
|                          | 0 days          | 21 days |
| <i>Azospirillum</i>      | 22390           | 20611   |
| <i>Pannonibacter</i>     | 13626           | 1627    |
| <i>Spirosomaceae</i>     | 8524            | 3692    |
| <i>Chryseobacterium</i>  | 2921            | 1056    |
| <i>Proteiniphilum</i>    | 2531            | 683     |
| <i>Reyranella</i>        | 1948            | 898     |
| <i>Taibaella</i>         | 1406            | 825     |
| <i>Desulfovibrio</i>     | 1005            | 683     |
| <i>R-7 group</i>         | 961             | 942     |
| <i>Hydrogenophaga</i>    | 745             | 3       |
| <i>Rikenellaceae</i>     | 731             | 132     |
| <i>Petrimonas</i>        | 559             | 5041    |
| <i>Stenotrophomonas</i>  | 417             | 681     |
| <i>Shinella</i>          | 132             | 570     |
| <i>Brevundimonas</i>     | 392             | 475     |
| <i>Desulfosporosinus</i> | 782             | 1005    |
| <i>Ruminiclostridium</i> | 584             | 744     |
| <i>Hyphomonas</i>        | 160             | 544     |
